# Supplementary material
Source: Springer Nature journal article supplement (https://www.springermedizin.de/resource/supplementary/12943_2009_790_MOESM2_ESM.pdf/9554836)
Supplement: MOESM2 [file 9554836]

# Ligands

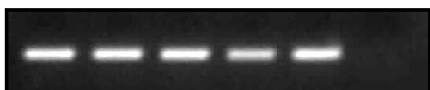

VEGFA

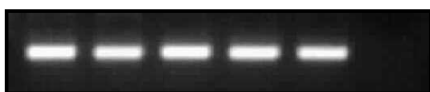

VEGFB

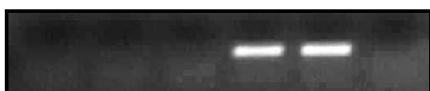

VEGFC

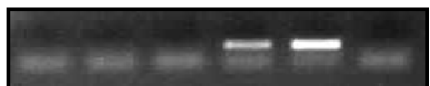

HGF

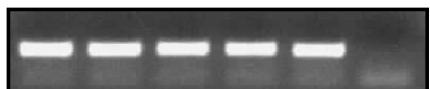

PDGFA

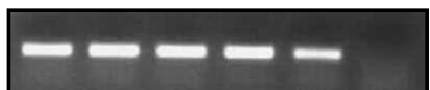

PDGFB

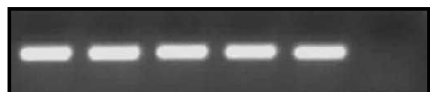

actin

Caco2  
HCT116  
HT29  
HDMEC  
U(+)  
U(-)

# Receptors

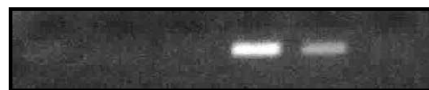

VEGFR1

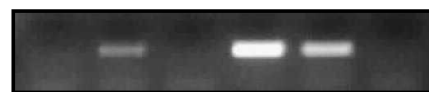

VEGFR2

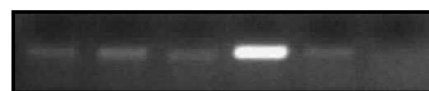

VEGFR3

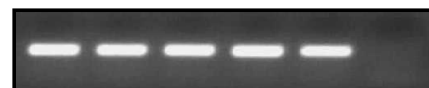

NRP1

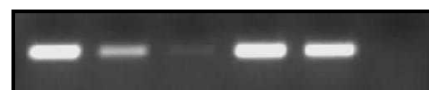

NRP2

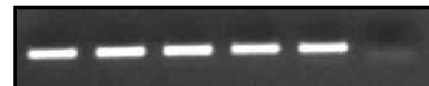

HGFR

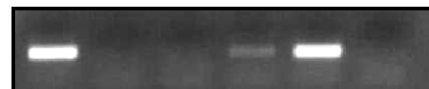

PDGFR  $\alpha$

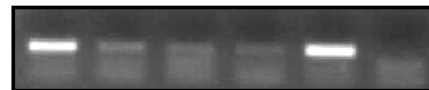

PDGFR  $\beta$

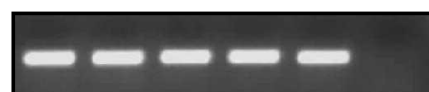

actin

Caco2  
HCT116  
HT29  
HDMEC  
U(+)  
U(-)
